# Supplementary material
Source: publisher site journal article supplement (https://www.dovepress.com/article/488368)
Supplement: Supplementary file 1 [file get_supplementary_file.php]

**Supplemental Methods**

**Table S1. Sociodemographic and clinical** **characteristics of the subjects.**

| **Index** | **Old group** | **Young group** | ***P* value** |
| --- | --- | --- | --- |
| Age (years), mean ± SD | 67.77 ± 1.83 | 22.15 ± 1.95 | < 0.001 |
| Sex | Male | Male | - |
| BMI (kg/m2), mean ± SD | 24.09 ± 1.75 | 22.97 ± 1.46 | 0.09 |
| Medicines | no | no | - |
| Disease symptoms | no | no | - |
| Metabolic disorders | no | no | - |
| Physical examination | Normal | Normal | - |

BMI, body mass index; SD, standard deviation.

**Figure S1.** **Electron microscopy images and NanoSight analysis of Old-sEVs, along with the average particle sizes of Old-sEVs and Young-sEVs.**


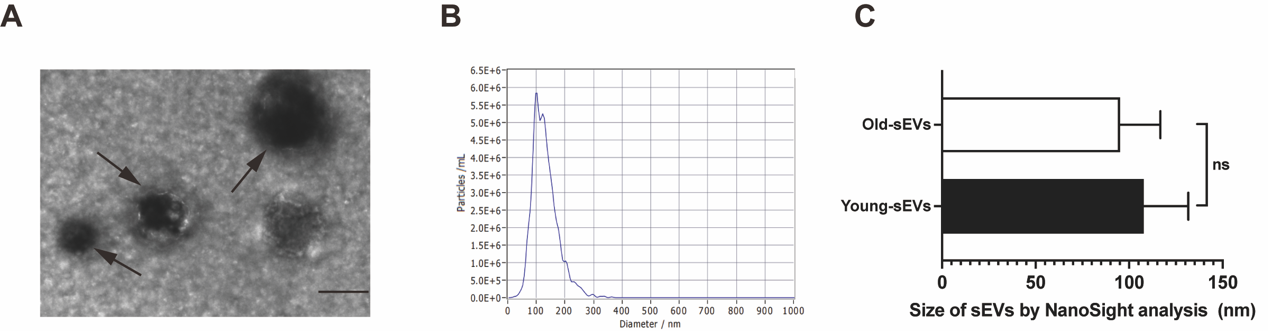


(A) Transmission electron microscopy imaging of old healthy human plasma-derived sEVs (scale bar = 100 nm).

(B) Particle size distribution analysis using NanoSight tracking analysis.

(C) NanoSight analysis of the average particle sizes of Old-sEVs and Young-sEVs (n = 5; Data are presented as mean ± SD; ns, no statistical difference).

Old-sEVs, small extracellular vesicles from old healthy human plasma; Young-sEVs, small extracellular vesicles from young healthy human plasma.

**Figure S2.** **TGF-β1 induced the ﬁbrosis of CFs.**


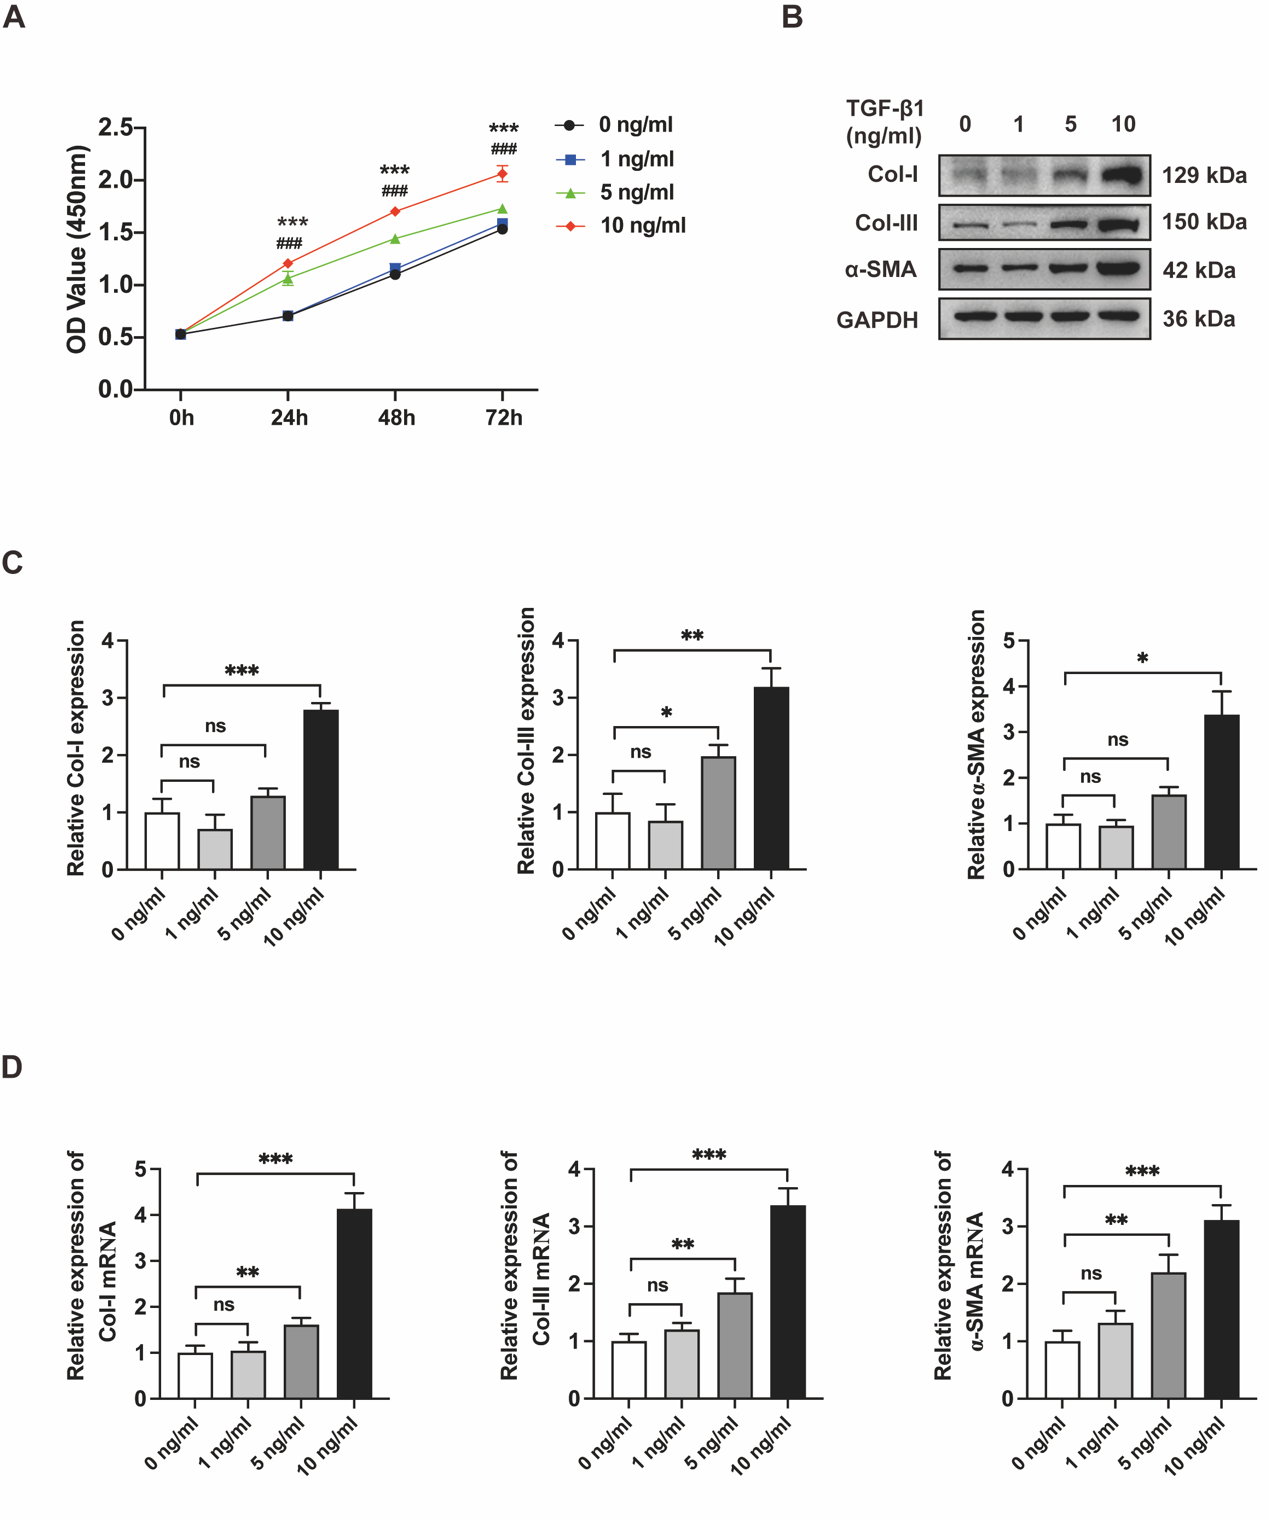


(A) The growth curve of CFs stimulated by TGF-β1 at different concentrations (0, 1 ng/ml, 5 ng/ml and 10 ng/ml) was determined using the CCK-8 assay at 0h, 24h, 48h and 72h (**P* < 0.05, ***P* < 0.01, ****P* < 0.001, 0ng/ml vs. 5ng/ml; #*P* < 0.05, ##*P* < 0.01, ###*P* < 0.001, 0ng/ml vs. 10ng/ml).

(B, C) Western blotting analysis of the protein expression of fibrosis markers (Col-1, Col-III and α-SMA) under stimulation with different concentrations of TGF-β1 (0, 1 ng/ml, 5 ng/ml and 10 ng/ml).

(D) qRT-PCR analysis was used to examine the mRNA expression of fibrosis markers (Col-I, Col-III and α-SMA) under stimulation with different concentrations of TGF-β1 (0, 1 ng/ml, 5 ng/ml and 10 ng/ml).

Data are presented as mean ± SD. **P* < 0.05, ***P* < 0.01, ****P* < 0.001, compared with the 0 ng/ml group. α-SMA, alpha smooth muscle actin; CCK-8, cell counting kit-8; CFs, cardiac fibroblasts; Col-I, collagen I; Col-III, collagen III; GAPDH, Glyceraldehyde-3-Phosphate Dehydrogenase; ns, no statistical difference; OD, optical density; qRT-PCR, quantitative real-time polymerase chain reaction; TGF-β1, transforming growth factor beta 1.

**Figure S3. The expression of other 11 miRNAs in 10 young healthy individuals.**Data are presented as mean ± SEM. Old, plasma from old healthy human; Young, plasma from young healthy human; ns, no statistical difference.

**Table S2. The 24 common candidate target genes of miR-664a-3p with higher scores in the TargetScanHuman, miRBase, and miRWalk databases.**

| **Gene Symbol** | **Gene Description** |
| --- | --- |
| ACSL6 | acyl-CoA synthetase long chain family member 6 |
| ADCY7 | adenylate cyclase 7 |
| AHCTF1 | AT-hook containing transcription factor 1 |
| BCAT1 | branched chain amino acid transaminase 1 |
| DBT | dihydrolipoamide branched chain transacylase E2 |
| DENND4C | DENN domain containing 4C |
| HNRNPDL | heterogeneous nuclear ribonucleoprotein D like |
| ICOS | inducible T cell costimulator |
| INO80D | INO80 complex subunit D |
| KCMF1 | potassium channel modulatory factor 1 |
| KLF12 | Kruppel like factor 12 |
| NAPEPLD | N-acyl phosphatidylethanolamine phospholipase D |
| PCTP | phosphatidylcholine transfer protein |
| PLEKHB1 | pleckstrin homology domain containing B1 |
| PRR18 | proline rich 18 |
| QKI | QKI, KH domain containing RNA binding |
| RAB27B | RAB27B, member RAS oncogene family |
| RNF157 | ring finger protein 157 |
| RRM2 | ribonucleotide reductase regulatory subunit M2 |
| SMAD4 | SMAD family member 4 |
| STT3A | STT3A, catalytic subunit of the oligosaccharyltransferase complex |
| TMEM251 | transmembrane protein 251 |
| UVRAG | UV radiation resistance associated |
| ZNF423 | zinc finger protein 423 |

**Figure S4. Perform Gene Ontology (GO) analysis on the transcripts of predicted target genes.**

**Figure S5. Perform Kyoto Encyclopedia of Genes and Genomes (KEGG) pathway analysis on the transcripts of predicted target genes.**

The Q-value represents the adjusted *P*-value, a more stringent form of *P*-value. A Q-value less than 0.05 is considered statistically significant.
